# Supplementary material
Source: Elsevier journal article supplement (https://arts.units.it/retrieve/0fccf682-110f-4bdf-9e99-d7e795fb9ec6/mmc1.pdf)

**Impact of the Non-Invasive Diagnostic Algorithm on Clinical Presentation and Prognosis in  
Cardiac Amyloidosis**

*Giacomo Tini et al.*

**Supplementary Material**

**Supplementary Table 1. Characteristics of study population at time of diagnosis**

|                                            | Overall cohort<br>n=887 (%) | AL<br>n=311 (%) | ATTRm<br>n=87 (%) | ATTRwt<br>n=489 (%) |
|--------------------------------------------|-----------------------------|-----------------|-------------------|---------------------|
| Gender                                     |                             |                 |                   |                     |
| <i>Males</i>                               | 692 (78)                    | 178 (57)        | 67 (77)           | 447 (91)            |
| <i>Females</i>                             | 195 (22)                    | 133 (43)        | 20 (23)           | 42 (9)              |
| Age at diagnosis<br>(mean±SD)              | 73 ± 10                     | 66 ± 11         | 69 ± 12           | 78 ± 6              |
| Arterial hypertension                      | 507 (57)                    | 126 (41)        | 43 (49)           | 338 (69)            |
| Diabetes mellitus                          | 127 (14)                    | 34 (11)         | 9 (10)            | 84 (17)             |
| CKD                                        | 270 (30)                    | 96 (31)         | 13 (15)           | 161 (33)            |
| History of CAD                             | 133 (15)                    | 34 (11)         | 12 (14)           | 87 (18)             |
| History of HF prior to<br>diagnosis        | 555 (63)                    | 221 (71)        | 33 (38)           | 301 (72)            |
| History of AF prior to<br>diagnosis        | 370 (42)                    | 78 (25)         | 25 (29)           | 267 (55)            |
| History of PMK prior to<br>diagnosis       | 106 (12)                    | 18 (6)          | 11 (13)           | 77 (16)             |
| History of ICD prior to<br>diagnosis       | 22 (3)                      | 7 (2)           | 1 (1)             | 14 (3)              |
| Low voltages                               | 285 (35)                    | 149 (53)        | 23 (28)           | 113 (26)            |
| LBBB                                       | 61 (8)                      | 10 (4)          | 6 (7)             | 45 (10)             |
| NYHA at diagnosis                          |                             |                 |                   |                     |
| <i>I-II</i>                                | 602 (68)                    | 166 (53)        | 72 (82)           | 364 (74)            |
| <i>III-IV</i>                              | 285 (32)                    | 145 (47)        | 15 (17)           | 125 (26)            |
| IVS (mm)                                   | 17 ± 3                      | 15 ± 3          | 16 ± 3            | 17 ± 3              |
| LA diameter (mm)                           | 46 ± 7                      | 44 ± 7          | 43 ± 6            | 47 ± 7              |
| LVEF (%)                                   | 55 ± 10                     | 55 ± 11         | 55 ± 11           | 54 ± 10             |
| TAPSE (mm)                                 | 18 ± 5                      | 18 ± 5          | 18 ± 5            | 18 ± 5              |
| Restrictive filling pattern                | 265 (30)                    | 112 (36)        | 18 (21)           | 135 (28)            |
| Moderate-to-severe mitral<br>regurgitation | 194 (23)                    | 65 (23)         | 18 (21)           | 111 (23)            |
| Diagnoses by year                          |                             |                 |                   |                     |
| <i>Before 2016</i>                         | 199 (22)                    | 145 (47)        | 15 (17)           | 39 (8)              |
| <i>After 2016</i>                          | 688 (78)                    | 166 (53)        | 72 (83)           | 450 (92)            |
| NAC score                                  | -                           |                 |                   |                     |
| <i>I</i>                                   |                             | -               | 29 (69)           | 136 (52)            |
| <i>II</i>                                  |                             |                 | 11 (26)           | 98 (38)             |
| <i>III</i>                                 |                             |                 | 2 (5)             | 27 (10)             |
| Mayo score                                 | -                           |                 |                   |                     |
| <i>I</i>                                   |                             | 58 (29)         | -                 | -                   |
| <i>II</i>                                  |                             | 66 (33)         |                   |                     |
| <i>III</i>                                 |                             | 78 (38)         |                   |                     |

**Supplementary Table 2. TTR mutations in the ATTRv group**

|           | n=87 (%) |
|-----------|----------|
| Ile68Leu  | 39 (45)  |
| Val122Ile | 15 (17)  |
| Val30Met  | 11 (13)  |
| Phe64Leu  | 7 (8)    |
| Glu89Gln  | 6 (7)    |
| Tyr78Phe  | 2 (2)    |
| Ala109Ser | 1 (1)    |
| Ala120Ser | 1 (1)    |
| Ala36Pro  | 1 (1)    |
| Arg34Thr  | 1 (1)    |
| Glu74Gln  | 1 (1)    |
| Gly67Glu  | 1 (1)    |
| Gly67Arg  | 1 (1)    |

**Supplementary Table 3. Characteristics of patients grouped by Centre**

|                                      | Bologna<br>n=148 (%) | Firenze<br>n=402 (%) | Genova<br>n=45 (%) | Roma<br>n=139 (%) | Trieste<br>n=153 (%) |
|--------------------------------------|----------------------|----------------------|--------------------|-------------------|----------------------|
| Gender                               |                      |                      |                    |                   |                      |
| <i>Males</i>                         | 121 (82)             | 320 (80)             | 35 (78)            | 107 (77)          | 109 (71)             |
| <i>Females</i>                       | 27 (8)               | 82 (20)              | 10 (22)            | 32 (23)           | 44 (29)              |
| Age at diagnosis<br>(mean±SD)        | 74 ± 11              | 75 ± 10              | 72 ± 10            | 70 ± 11           | 71 ± 11              |
| Arterial hypertension                | 111 (75)             | 204 (51)             | 22 (49)            | 65 (47)           | 105 (69)             |
| Diabetes mellitus                    | 19 (13)              | 62 (15)              | 5 (11)             | 13 (9)            | 28 (20)              |
| CKD                                  | 50 (34)              | 131 (33)             | 9 (20)             | 15 (11)           | 65 (47)              |
| History of CAD                       | 28 (19)              | 60 (15)              | 4 (9)              | 17 (12)           | 24 (16)              |
| History of HF prior to<br>diagnosis  | 98 (66)              | 228 (57)             | 26 (58)            | 73 (53)           | 130 (85)             |
| History of AF prior to<br>diagnosis  | 70 (47)              | 164 (41)             | 11 (24)            | 49 (35)           | 76 (50)              |
| History of PMK prior to<br>diagnosis | 24 (16)              | 54 (13)              | 1 (2)              | 12 (9)            | 15 (10)              |
| History of ICD prior to<br>diagnosis | 3 (2)                | 11 (3)               | 0                  | 5 (4)             | 3 (2)                |
| Low voltages                         | 32 (25)              | 124 (35)             | 17 (39)            | 61 (45)           | 51 (35)              |
| LBBB                                 | 12 (10)              | 26 (8)               | 2 (5)              | 7 (5)             | 14 (10)              |
| NYHA at diagnosis                    |                      |                      |                    |                   |                      |
| <i>I-II</i>                          | 122 (82)             | 296 (74)             | 39 (87)            | 55 (40)           | 90 (59)              |
| <i>III-IV</i>                        | 26 (18)              | 106 (26)             | 6 (13)             | 84 (60)           | 63 (41)              |
| IVS (mm)                             | 17 ± 3               | 16 ± 3               | 16 ± 4             | 16 ± 3            | 17 ± 4               |
| LA diameter (mm)                     | 47 ± 6               | 45 ± 7               | 45 ± 5             | 46 ± 6            | 46 ± 9               |
| LVEF (%)                             | 57 ± 11              | 56 ± 9               | 51 ± 8             | 51 ± 9            | 54 ± 13              |
| TAPSE (mm)                           | 15 ± 3               | 19 ± 5               | 18 ± 5             | 17 ± 5            | 18 ± 7               |

|                                                |           |            |            |           |           |
|------------------------------------------------|-----------|------------|------------|-----------|-----------|
| Restrictive filling pattern                    | 57 (59)   | 242 (64)   | 27 (64)    | 109 (80)  | 83 (65)   |
| Moderate-to-severe mitral regurgitation        | 38 (27)   | 73 (19)    | 16 (36)    | 35 (26)   | 32 (22)   |
| CA subtype                                     |           |            |            |           |           |
| <i>AL</i>                                      | 29 (19)   | 119 (30)   | 17 (38)    | 68 (49)   | 78 (51)   |
| <i>ATTRv</i>                                   | 20 (14)   | 37 (9)     | 8 (18)     | 20 (14)   | 2 (1)     |
| <i>ATTRwt</i>                                  | 99 (67)   | 246 (61)   | 20 (44)    | 51 (37)   | 73 (48)   |
| Diagnoses by year                              |           |            |            |           |           |
| <i>Before 2016</i>                             | 16 (13)   | 66 (16)    | 0          | 50 (36)   | 64 (42)   |
| <i>After 2016</i>                              | 129 (87)  | 336 (84)   | 45 (100)   | 89 (64)   | 89 (58)   |
| Follow-up time ( <i>months; median [IQR]</i> ) | 18 [8-37] | 21 [10-36] | 22 [10-40] | 15 [6-38] | 12 [5-31] |

**Supplementary figure captions.**

**Supplementary Figure 1.** Prevalence of events before and after 2016 in the overall cohort and for each CA subtype (composite outcome, *upper panel*; all-cause mortality, *lower left panel*; HF hospitalizations, *lower right panel*). Among CA patients diagnosed before 2016, 164 (82%) died – of whom 128 AL (88%), 10 ATTRv (67%), 26 ATTRwt (67%) – and 64 (46%) had an HF hospitalization – of whom 45 AL (46%), 5 ATTRv (36%), 26 ATTRwt (67%). Among those diagnosed after 2016, 235 (34%) died – of whom 90 AL (54%), 17 ATTRv (24%), 128 ATTRwt (28%) – and 131 (21%) had an HF hospitalization – of whom 30 AL (22%), 13 ATTRv (19%), 88 ATTRwt (20%).

**Supplementary Figure 2.** Kaplan Meier curves for all-cause mortality before (*panel A*) and after (*panel B*) PSW, and cumulative incidence (CI) for HF hospitalization before (*panel C*) and after (*panel D*) PSW, adjusted for competing risk of mortality.

**Supplementary Figure 3.** Forest plot showing hazard rates for the composite outcome after PSW at multivariate Cox regression analysis.

Figure 1.

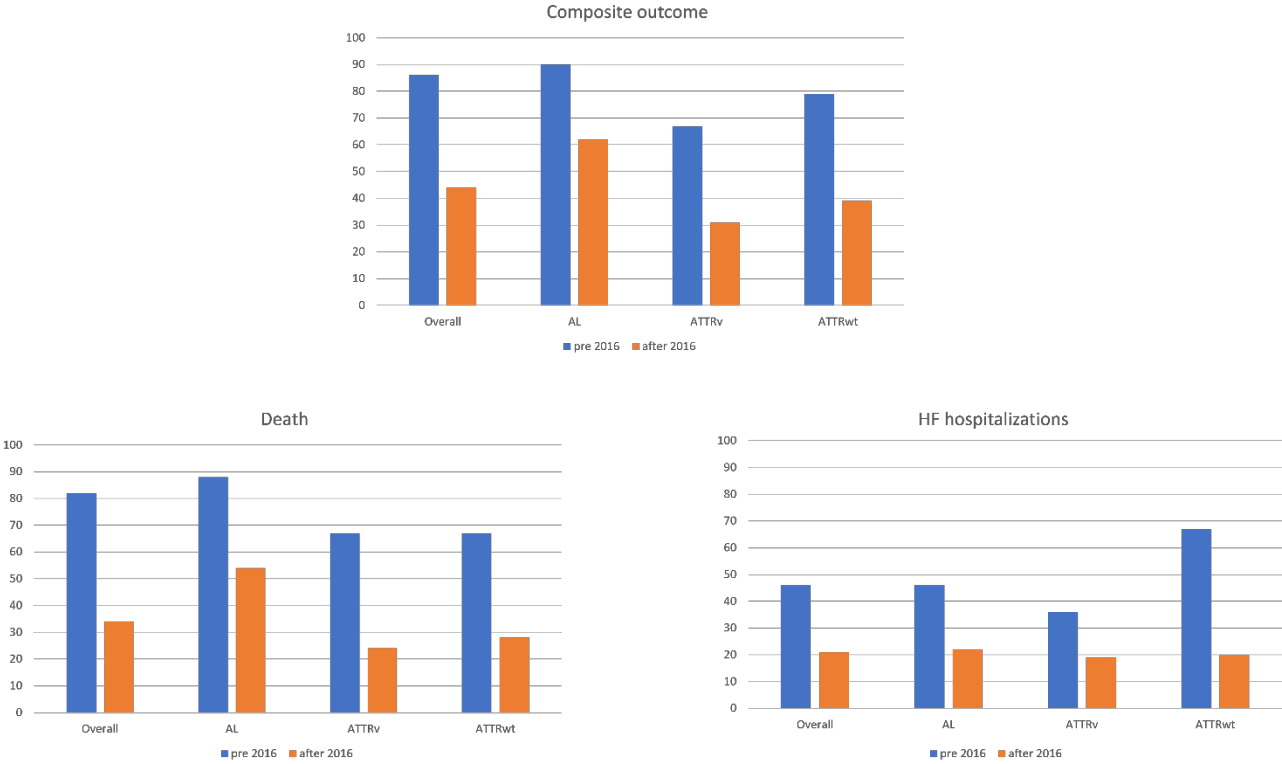

**Figure 2.**

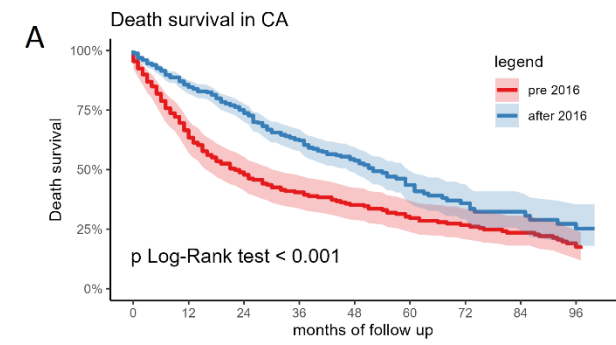

|            |     |     |     |     |    |    |    |    |    |
|------------|-----|-----|-----|-----|----|----|----|----|----|
| pre 2016   | 199 | 129 | 93  | 77  | 66 | 53 | 43 | 35 | 25 |
| after 2016 | 688 | 477 | 289 | 169 | 93 | 49 | 31 | 19 | 14 |

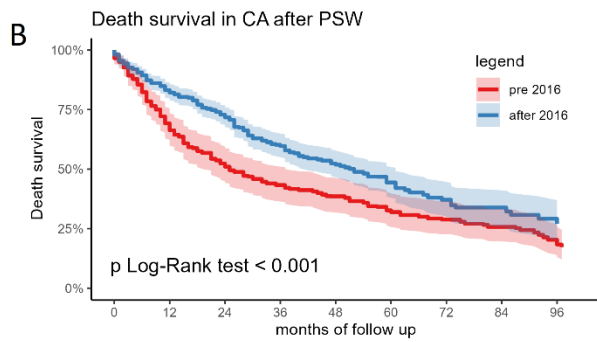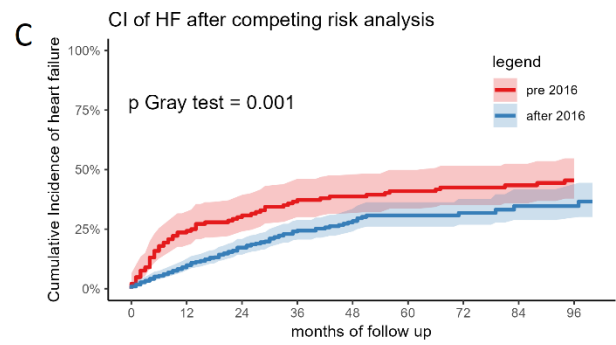

|            |     |     |     |     |    |    |    |    |    |
|------------|-----|-----|-----|-----|----|----|----|----|----|
| pre 2016   | 145 | 85  | 65  | 54  | 48 | 42 | 34 | 27 | 19 |
| after 2016 | 637 | 444 | 260 | 148 | 82 | 44 | 29 | 16 | 12 |

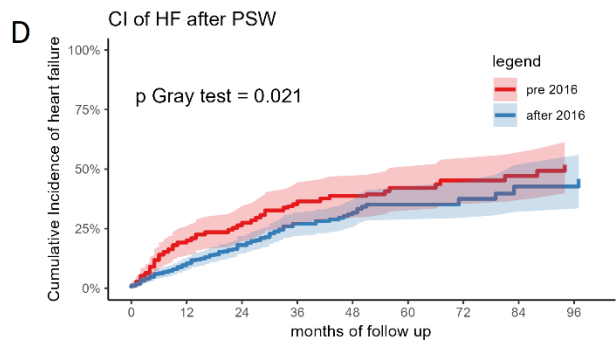



**Figure 3.**

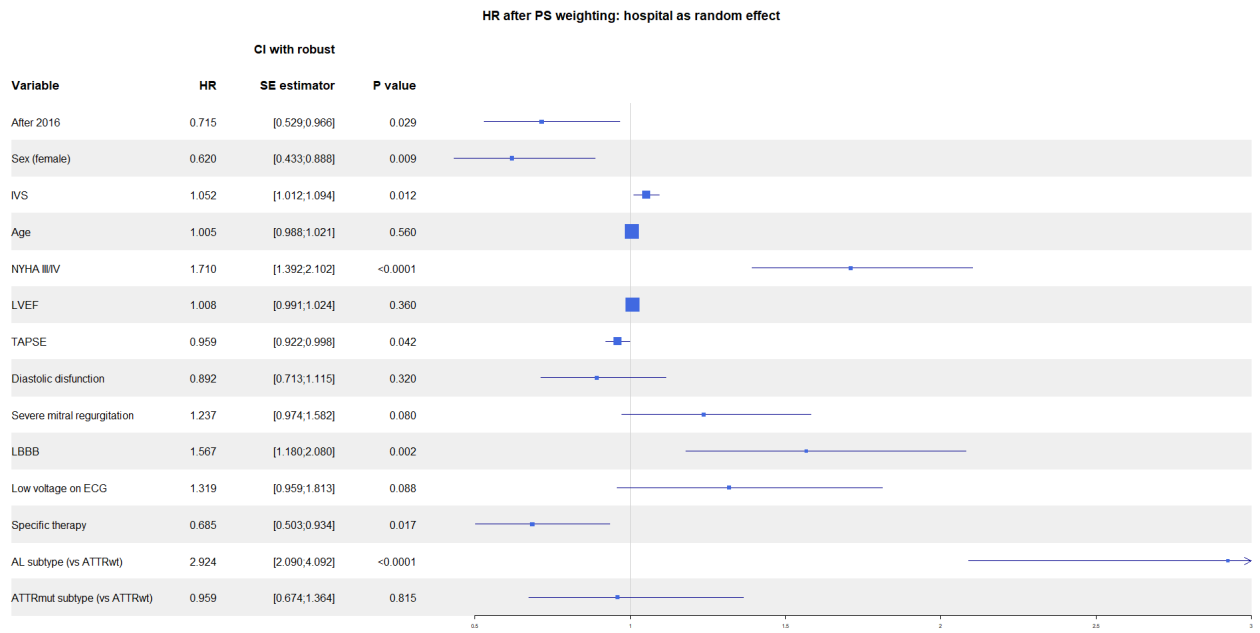

Supplement: mmc1 [file mmc1.pdf]
